# Supplementary material for: Exploiting Machine Learning Technologies to Study the Compound Effects of Serum Creatinine and Electrolytes on the Risk of Acute Kidney Injury in Intensive Care Units
Source: MDPI journal article supplement (doi:10.3390/diagnostics13152551), 2023-07-31
Supplement: s1 [file s1]

**Supplementary Table S3** The detailed performance data observed in the 5-fold cross validation process.

| Performance<br>metric                        | Sensitivity level 0.80    |                                 |                           | Sensitivity level 0.95    |                                 |                           |
|----------------------------------------------|---------------------------|---------------------------------|---------------------------|---------------------------|---------------------------------|---------------------------|
|                                              | Decision<br>tree<br>model | Logistic<br>regression<br>model | Random<br>forest<br>model | Decision<br>tree<br>model | Logistic<br>regression<br>model | Random<br>forest<br>model |
| Sensitivity                                  | 0.798                     | 0.799                           | 0.799                     | 0.949                     | 0.949                           | 0.949                     |
| Specificity                                  | 0.721                     | 0.773                           | 0.732                     | 0.479                     | 0.414                           | 0.382                     |
| Positive predictive<br>value (PPV)           | 0.116                     | 0.137                           | 0.119                     | 0.076                     | 0.068                           | 0.065                     |
| Negative<br>predictive value<br>(NPV)        | 0.987                     | 0.988                           | 0.988                     | 0.995                     | 0.994                           | 0.994                     |
| Accuracy                                     | 0.724                     | 0.774                           | 0.735                     | 0.499                     | 0.437                           | 0.407                     |
| F1-Measure                                   | 0.202                     | 0.235                           | 0.207                     | 0.142                     | 0.127                           | 0.121                     |
| Matthews<br>Correlation<br>Coefficient (MCC) | 0.232                     | 0.568                           | 0.238                     | 0.175                     | 0.151                           | 0.140                     |
| Relative risk                                | 9.845                     | 11.98                           | 10.14                     | 16.89                     | 13.87                           | 13.01                     |
| Area Under the<br>Curve (AUC)                | 0.823                     | 0.857                           | 0.766                     | 0.767                     | 0.854                           | 0.666                     |

True positive (TP): The number of cases that the model predicted to be positive and were truly positive.

True negative (TN): The number of cases that the model predicted to be negative and were truly negative.

False positive (FP): The number of cases that the model predicted to be positive and were reality are negative.

False negative (FN): The number of cases that the model predicted to be negative and were reality are positive.

$$\text{Sensitivity} = \frac{TP}{TP+FN}$$

$$\text{Specificity} = \frac{TN}{TN+FP}$$

$$\text{PPV} = \frac{TP}{TP+FP}$$

$$\text{NPV} = \frac{TN}{TN+FN}$$

$$\text{Accuracy} = \frac{TP+TN}{TP+TN+FP+FN}$$

$$\text{F1} = \frac{2 \times TP}{2 \times TP + FP + FN}$$

$$\text{MCC} = \frac{TP \times TN - FP \times FN}{\sqrt{(TP+FP) \times (TP+FN) \times (TN+FP) \times (TN+FN)}}$$

$$\text{Relative risk} = \frac{TP / (TP+FP)}{FN / (FN+TN)}$$
