# Supplementary material for: Exploiting Machine Learning Technologies to Study the Compound Effects of Serum Creatinine and Electrolytes on the Risk of Acute Kidney Injury in Intensive Care Units
Source: MDPI journal article supplement (doi:10.3390/diagnostics13152551), 2023-07-31
Supplement: s1 [file s1]

**Supplementary Table S1** The ICD-9 and ICD-10 codes employed to identify post-renal AKI cases.

| ICD-9                                                      | Codes                                                                |
|------------------------------------------------------------|----------------------------------------------------------------------|
| Benign prostatic hyperplasia                               | 600.00, 600.01, 600.20, 600.21, 600.90, 600.91, 752.89               |
| Calculus of kidney and urinary tract                       | 592.0, 592.1, 592.9, 593.4, 594.1, 594.8, 594.9, 753.20, 753.3       |
| Urinary Obstruction                                        | 599.60, 599.69, 753.6                                                |
| Benign neoplasm of prostate                                | 222.2                                                                |
| Malignant neoplasm of prostate                             | 185                                                                  |
| ICD-10                                                     | Code                                                                 |
| Obstructive and reflux uropathy                            | N13.0, N13.1, N13.2, N13.3, N13.4, N13.5, N13.6, N13.7, N13.8, N13.9 |
| Calculus of kidney and ureter                              | N20.0, N20.1, N20.2, N20.9                                           |
| Calculus of lower urinary tract                            | N21.0, N21.1, N21.8, N21.9                                           |
| Calculus of urinary tract in diseases classified elsewhere | N22                                                                  |
| Benign prostatic hyperplasia                               | N40.0, N40.1, N40.2, N40.3                                           |
| Malignant neoplasm of prostate                             | C61                                                                  |
| Benign neoplasm of prostate                                | D29.1                                                                |
