# Supplementary material for: Exploiting Machine Learning Technologies to Study the Compound Effects of Serum Creatinine and Electrolytes on the Risk of Acute Kidney Injury in Intensive Care Units
Source: MDPI journal article supplement (doi:10.3390/diagnostics13152551), 2023-07-31
Supplement: s1 [file s1]

**Supplementary Table S2** Summary of the software packages employed and parameter ranges.

| Model         | Package (version)                   | Parameter ranges                                                           |
|---------------|-------------------------------------|----------------------------------------------------------------------------|
| Decision tree | rpart (4.1.19)<br><br>R (4.2.1)     | Method: class                                                              |
|               |                                     | Cp: 0.01,0.005,0.001                                                       |
|               |                                     | Prior: 0.4 ~ 0.95 with 0.0005 resolution                                   |
|               |                                     | Maxdepth: 5                                                                |
|               |                                     | Minsplit: 5, 13                                                            |
| Random forest | Xgboost (1.5.2)<br><br>Python (3.9) | tree_method: gpu_hist                                                      |
|               |                                     | eta: 0.0001, 0.001, 0.1, 0.3, 0.5, 0.6, 0.8                                |
|               |                                     | max_depth: 3, 5, 6, 7                                                      |
|               |                                     | min_child_weight: 10, 3, 1, 0.9, 0.5, 0.1                                  |
|               |                                     | max_delta_step: 0, 0.3, 0.5, 0.8, 1, 5                                     |
|               |                                     | n_estimators: 10, 50, 100, 300                                             |
|               |                                     | scale_pos_weight: 0.1, 0.5, 0.7, 1.0, 2, 4, 5, 10, 15, 20, 25, 50, 80, 100 |
|               |                                     | eval_metric: auc                                                           |
