# Supplementary material for: Exploiting Machine Learning Technologies to Study the Compound Effects of Serum Creatinine and Electrolytes on the Risk of Acute Kidney Injury in Intensive Care Units
Source: Diagnostics (Basel). 2023 Jul 31;13(15):2551. doi: 10.3390/diagnostics13152551 (PMC10417601; doi:10.3390/diagnostics13152551)
Supplement: Supplementary file 1 [file diagnostics-13-02551-s001.zip]

Archive with 6 entries (6 files):
- Supplementary Table S1.pdf
- __MACOSX/._Supplementary Table S1.pdf
- Supplementary Table S2.pdf
- __MACOSX/._Supplementary Table S2.pdf
- Supplementary Table S3.pdf
- __MACOSX/._Supplementary Table S3.pdf
